# Supplementary material for: Plant-type pentatricopeptide repeat proteins with a DYW domain drive C-to-U RNA editing in Escherichia coli
Source: PubMed Central journal article supplement (PMC6397227; doi:10.1038/s42003-019-0328-3), 2019-03-01
Supplement: 42003_2019_328_MOESM2_ESM.pdf [file 42003_2019_328_MOESM2_ESM.pdf]

# Supplementary Information

## Supplementary Figures

PPR56

native targets

97 2.46E+06 nad3eU230SL  
nad4eU272SL

All 79 off-targets:

| Genome pos.    | Ed. [%]   | Read cov.   | Edit label             |
|----------------|-----------|-------------|------------------------|
| 73332          | 3         | 672         | AJH13041eU141LL        |
| 94366          | 12        | 816         | AJH09043eU149PL        |
| 94885          | 37        | 626         | AJH09043eU668SF        |
| 129483         | 2         | 795         | AJH09074eU984HH        |
| 138799         | 36        | 278         | AJH09079eU470SF        |
| 146890         | 11        | 133         | AJH09086eU385LL        |
| 190475         | 9         | 231         | AJH09124eU1019AV       |
| 270580         | 20        | 95          | AJH09197eU542TM        |
| 365238         | 25        | 188         | AJH09280eU311PL        |
| 375322         | 10        | 128         | AJH13053eU100PS        |
| 423469         | 3         | 1517        | AJH09340eU653PL        |
| 477438         | 5         | 314         | AJH09387eU175LL        |
| 526833         | 87        | 163         | AJH09430eU-5           |
| 623165         | 8         | 296         | AJH09525eU1161FF       |
| 740583         | 6         | 192         | AJH09626 as            |
| 883789         | 13        | 2802        | AJH09767eU1130TI       |
| 896373         | 2         | 6150        | AJH09777eU86AV         |
| 902437         | 67        | 66          | AJH09782eU980PL        |
| 912656         | 23        | 211         | AJH09788eU407TI        |
| 937766         | 1         | 5236        | AJH09807eU1517TI       |
| 958919         | 5         | 1944        | AJH09823eU1046SF       |
| 1058523        | 6         | 1399        | AJH13078eU-193         |
| 1125973        | 13        | 180         | AJH09982eU130LL        |
| 1145454        | 8         | 2273        | AJH09999eU269SL        |
| 1162861        | 2         | 2586        | AJH10015eU120LL        |
| 1272016        | 6         | 399         | AJH10120eU1157TI       |
| 1387170        | 9         | 1130        | AJH10234eU398SF        |
| 1487666        | 27        | 207         | AJH10318eU44PL         |
| 1489442        | 6         | 222         | AJH10319eU949HY        |
| 1489581        | 8         | 228         | AJH10319eU810LL        |
| <b>1582815</b> | <b>2</b>  | <b>3861</b> | <b>AJH10409eU112RC</b> |
| <b>1582816</b> | <b>10</b> | <b>3851</b> | <b>AJH10409eU111SS</b> |
| 1604568        | 2         | 1329        | AJH10430eU355Q*        |
| 1670907        | 6         | 792         | AJH10490eU776AV        |
| 1723586        | 13        | 118         | AJH10536eU629SL        |
| 1859712        | 6         | 178         | AJH10673eU728SL        |
| 1865979        | 8         | 238         | AJH10679eU65PL         |
| 1892408        | 23        | 73          | AJH10703eU520Q* +1     |
| 1960793        | 8         | 601         | AJH10757eU701TI        |
| 2006492        | 32        | 75          | AJH10799eU419SL        |
| 2021397        | 15        | 118         | SR36 22430eU30         |
| 2042138        | 3         | 3743        | AJH10825eU1152PP       |
| 2107487        | 4         | 462         | AJH10880eU230SF        |
| 2227619        | 17        | 2727        | AJH10979eU242SF        |
| 2296987        | 20        | 1460        | AJH11046eU1037SF       |
| 2345035        | 5         | 369         | AJH11086eU311TI        |

-11111  
-43210987654321  
LSPLSPLSPLSPLS  
5:VNNMTTVTNLTNVN  
L:SNDDNDDDDNDD  
CY GA GT AT T  
TTTGGAGTCACTTTCAT  
TATAGACCGTATCTTCAT  
-11111111  
-765432109876543210

GGAATGAAAGTTATAATTCACAA  
GTGGTTACAGTTATCTCCCGG  
CGTAATTGACATATTTCTCTA  
GAAAACGACGCTTATGTTGACGC  
GACCTTTGATGTCATTATCTCCG  
TTCTGGTGAACGCAATTTGACTG  
GTTTCGATGACCCATCTCCGCC  
GAAGATTGATGCTACCTAAACGA  
GACGGTGSATGTCATTTTCGCGA  
TAGCCTCGATGGCATTAAACCA  
CACCATCGACGTGACCTTCGCGG  
CTACTGAGATGGCATTTCGTCTG  
CGTAACAGATGGAATCCCTCTC  
ATCCCGGAGGTAACCTCTTCGG  
TAGCAGACGTTTTATCTTCGTCG  
CGCCGATGACCTATTTTCGACCT  
CGGCGGCAGCATATTTTCGCTC  
AAAACCGGAGTCACCTTCCTG  
TATTGAAGACGGCACCATCACTT  
CGAAGTTGACCTAAAATTCACCG  
CAAACAGACGGCATGTTCTCCT  
TCCTCCGTAGTCATCTCGTCAC  
AAGAAGAGCAGATATTTACCTG  
TCATCAGGACATTATCTCTCGC  
AAAGAAGCCGATTATTAATCAA  
CGGCATAGACATCTTCACCG  
TACCCGTGACCTAACCTCTCTC  
TGATTTACCCGTAATCTTCCTG  
TACACTGGCGTCATCTTCAC  
CAGCTGAGGCAATAATCTCGC  
TCTCGCGTATCGATCTTCGCGT  
GTCTCGCTATCGATCTTCGCG  
TCCCGTCSATGGCATCAATCAA  
GGTAGAAGGACCTTATCTTCGCC  
ATTAGCAGACGTCAAACCTCAT  
GAAGCACGATGGCACCATCTCGG  
TTTACAAGGACGATCTTACCTT  
-TAAAAAGACGTAAACTTCCGA  
ATTACTGSAAGGTAAAATTCACCG  
GGTACTGSAACCCATTTCTCAC  
TGACCGTGAAGCATACCTTCAG  
ATGATTAATCAGTATCTTCACAA  
GTATGTCGATGAAATTTCTCCG  
GTCGCCASATGTGATTTCTCTT  
CGTACAGSAGCTATCTATCTC  
GGAATCAGGACCCATCGTACTA

|         |    |       |                  |                            |
|---------|----|-------|------------------|----------------------------|
| 2361123 | 12 | 209   | AJH11100eU1031SF | GCGTGCTGAAGGCATCATCTCTG    |
| 2374733 | 4  | 11475 | AJH11112eU773TI  | CAATGAAGAAGCCATTCTACCG     |
| 2849754 | 1  | 3482  | AJH11527eU938TI  | CCAGCATGAAGGCATTAACCA      |
| 2872471 | 4  | 2554  | AJH11546eU175HY  | CAAAAGTGATGGTAACCTCCAC     |
| 2977196 | 14 | 143   | AJH11641eU203PL  | GCTGAGTGCACCTATCTTCCTG     |
| 3178109 | 43 | 95    | AJH11830eU170SL  | GTTACCAGAAGTCATCGTCTCGC    |
| 3179691 | 35 | 307   | AJH11831eU761TI  | GATGATTGAAGGCATCTTACCG     |
| 3277125 | 6  | 8222  | AJH11927eU95SF   | TGAACGAGAGCGATCATCTCTG     |
| 3277358 | 4  | 7534  | AJH11928eU416PL  | CCGTGAGCAGATCATCTTCCTG     |
| 3305587 | 2  | 1664  | AJH11967eU599PL  | CCGTCTGGAAGGTGTTAATCCG     |
| 3363579 | 6  | 4902  | AJH12024eU1217SF | +1 -CGAACCGAAGCCAAACCTCTCC |
| 3409781 | 6  | 188   | AJH12057eU126LL  | TTTCTTGATGCGGATTCCTTC      |
| 3471791 | 1  | 7294  | AJH12116eU131SF  | CCACGTAGATGTAAACTAATCTG    |
| 3472102 | 8  | 1392  | AJH12116eU+7     | ACGAAGAGAATAAATCTTCCTC     |
| 3605169 | 6  | 2363  | AJH12227eU596SL  | CATTAACCGGATCTTCCTCGC      |
| 3630364 | 12 | 3031  | AJH12248eU554SL  | TGCCACCATGGTGTGTTCTCAA     |
| 3630526 | 3  | 3177  | AJH12248eU392SF  | TGCGGAAGACCCATTATCTCG      |
| 3641764 | 9  | 340   | AJH12258eU147LL  | GCGGGCAAGAGCTATTTCTCAA     |
| 3736688 | 4  | 1879  | AJH12347eU1393Q* | TCGATAAGATGCTCTCTCTCAG     |
| 3810509 | 21 | 701   | AJH12408eU545PL  | TGAAAACGAAGTACTTTCCAC      |
| 3859166 | 11 | 211   | AJH12448eU1742PL | TATGGAAGAGGCATGTTCCAA      |
| 3887096 | 7  | 1317  | AJH12476eU142RC  | CGGTAAACTGTCATCCACCGC      |
| 3923427 | 2  | 744   | AJH12508eU560SF  | GCGCTGATGAGTGACTCTCTG      |
| 3956578 | 21 | 589   | AJH12535eU403Q*  | ATCTGGAGAGGCATCGATCAG      |
| 3991825 | 12 | 297   | AJH12570eU842SF  | CAGCGATAACCTCATCTCTCTG     |
| 4033152 | 23 | 1200  | AJH12604eU686TI  | CCGTGCTGACGTTATCTTCACCC    |
| 4143818 | 15 | 272   | AJH12685eU131PL  | CAACGAAGACGAATTAATCCAC     |
| 4208858 | 3  | 656   | AJH13206eU659PL  | GCTGGAAGATGTCATTCTCCCT     |
| 4209610 | 4  | 1161  | AJH12742eU585HH  | ACCCTGGAGTGCATATCAAGAA     |
| 4210006 | 3  | 1887  | AJH12742eU189LL  | GAAGATGACTGCATTTCTCGC      |
| 4243206 | 20 | 2333  | AJH12767eU1373SF | GGAACCTGACGATATTTCTCCG     |
| 4282671 | 2  | 523   | AJH12803eU333SS  | AAAGATGATTTGTATCTCTCCAG    |
| 4515459 | 4  | 404   | AJH13027eU1583TI | GTTCTTCGAAGGTAACCTTACTG    |

**Supplementary Figure 1. All 79 off-targets of PPR56 (labelled as in figure 4) identified in the *E. coli* BL21 transcriptome sorted by genomic position (accession CP010816).** Shading in black, green and yellow indicates nucleotide conservation in 90%, 60% or 30% of sequences. The single case of an editing detected in antisense to an annotated gene is labeled 'as'. Six mRNAs (encoding proteins AJH09043, AJH10319, AJH10409, AJH12116 and AJH12742) are affected by two edits each. The case of AJH10409 is highlighted in bold with low editing in position 1582815 (2%, eU112RC) likely caused as a by-reaction of more efficient editing at the directly adjacent cytidine 1582816 (10%, eU111SS), better matching the target consensus.

## PPR65 protein modifications

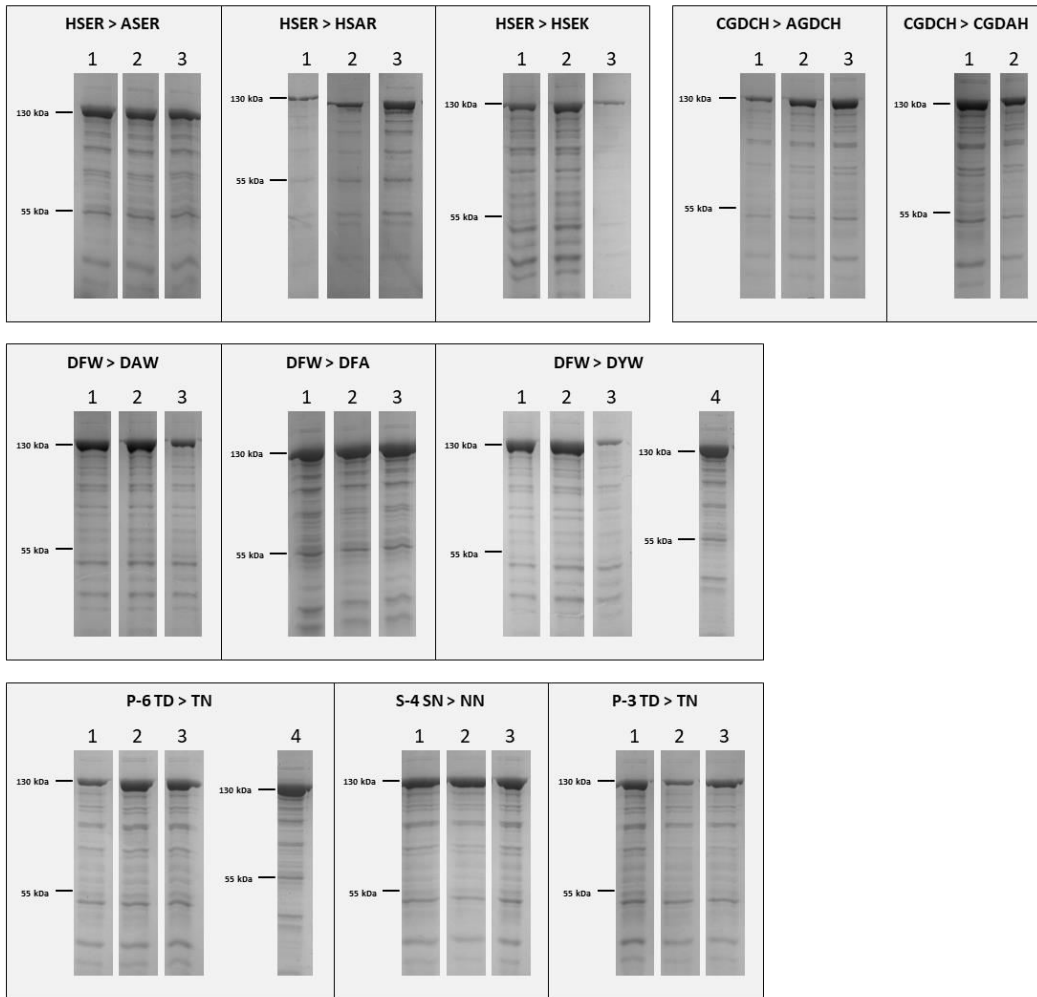

## PPR56

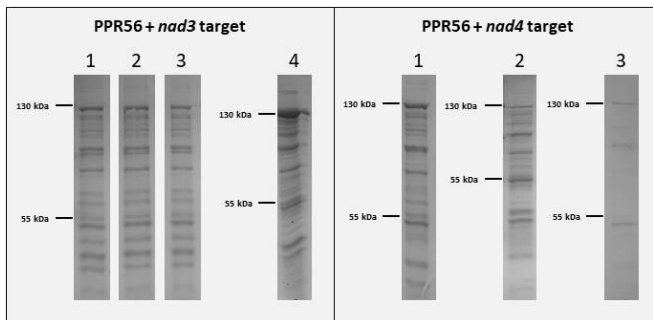

**Supplementary Figure 2. Protein expression of modified versions of PPR65 and of PPR56 upstream of its two alternative targets in *E. coli*.** Bacterial lysates of all biological replicates were loaded on denaturing SDS-PAGE gels (corresponding to ca.  $4.5 \times 10^7$  cells of a 20h-culture after IPTG-induction) like shown in Fig. 1B for native and truncated PPR65. Note that absence of editing was observed in many cases despite very strong expression of mutant proteins (e.g. PPR65 HSER>ASER, DFW>DFA, S-4SN>NN). *Vice versa*, 100% editing was observed even upon low amounts of detectable protein

(most notably PPR56+nad4 replicate 3 or PPR65 DFW>DYW replicate 3). Replicate 3 of the PPR65 HSER>HSEK mutation may be one exceptional example for a correlation of lower editing (34% vs. 50-55%) with lower protein expression.

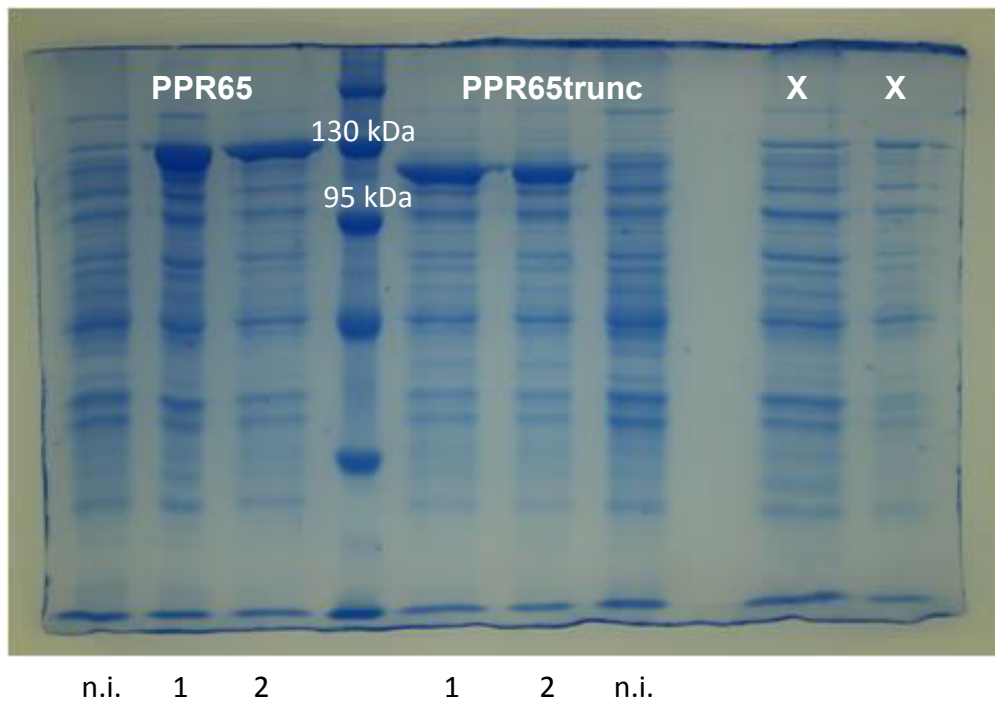

**Supplementary Figure 3. Original SDS gel image presented and described in Figure 1.** Shown are protein expressions for two independent *E. coli* cultures with PPR65 and C-terminally truncated PPR65, respectively and non-induced samples as negative controls. Bacterial lysates on a denaturing SDS-page gel correspond to ca.  $4.5 \times 10^7$  cells of a 20h-culture after IPTG-induction. (n.i. = non-induced, PPR65trunc = C-terminally truncated). X: protein expression of a culture not described in the publication.
