# Supplementary material for: Plant-type pentatricopeptide repeat proteins with a DYW domain drive C-to-U RNA editing in Escherichia coli
Source: PubMed Central journal article supplement (PMC6397227; doi:10.1038/s42003-019-0328-3), 2019-03-01
Supplement: 42003_2019_328_MOESM7_ESM.pdf [file 42003_2019_328_MOESM7_ESM.pdf]

LOCUS Exported 8695 bp ds-DNA circular SYN 13-JAN-2019  
 DEFINITION synthetic circular DNA  
 ACCESSION .  
 VERSION .  
 KEYWORDS .  
 SOURCE synthetic DNA construct  
 ORGANISM synthetic DNA construct  
 REFERENCE 1 (bases 1 to 8695)  
 AUTHORS .  
 TITLE Direct Submission  
 JOURNAL Exported Jan 13, 2019 from SnapGene Viewer 4.2.11  
<http://www.snapgene.com>  
 COMMENT Ligation of : PPR65\_LR\_pETG41KMCS.xdna [8647 nt] : (Bsp119I[8503] /  
 HindIII[8489]) to [42 nt] : (Uncut 5'[0] / Uncut 3'[42])  
 FEATURES Location/Qualifiers  
     source 1..8695  
         /organism="synthetic DNA construct"  
         /mol\_type="other DNA"  
     rep\_origin 14..469  
         /direction=RIGHT  
         /label=f1 ori  
         /note="direction=RIGHT - label=f1 ori - note=""f1  
         bacteriophage origin of replication; arrow - indicates  
         direction of (+) strand synthesis"" - 12..467"  
     CDS complement(565..1377)  
         /product="aminoglycoside phosphotransferase"  
         /label=KanR  
     rep\_origin 1477..2105  
         /direction=RIGHT  
         /label=ori  
         /note="high-copy-number Cole1/pMB1/pBR322/pUC origin of  
         replication"  
     misc\_feature 2273..2415  
         /label=bom  
         /note="basis of mobility region from pBR322"  
     CDS complement(2517..2708)  
         /product="Rop protein, which maintains plasmids at low copy  
         number"  
         /label=rop  
     CDS complement(3517..4608)  
         /codon\_start=1  
         /product="lac repressor"  
         /label=lacI  
         /note="lac repressor"  
         /translation="VVNVKPVTLVDVAEYAGVSYQTVSRVVNQASHVSAKTREKVEAAM  
         AELNYIPNRVAQQLAGKQSLIIGVATSSLALHAPSQIVAAIKSRADQLGASVVVSMVER  
         SGVEACKAAVHNLQAQRVSLIINYPLDDQDAIAVEAACTNVPALFLDVSDQTPINSII  
         FSHEDGTRLGVEHLVALGHQQIALLAGPLSSVSARLRLAGWHKYLTRNQIQPIAEREGD  
         WSAMSGFQQTMLNEGIVPTAMLVANDQMALGAMRAITESGLRVGADISVVGYYDDTETD  
         SSCYIPPLTTIKQDFRLLGQTSVDRLLQLSQGQAVKGNQLLPVSLVKKRKTTLAPNTQTA  
         SPRALADSLMQLARQVSRLESGQ"  
     promoter complement(4600..4677)  
         /label=lacI promoter  
         /note="gene=""lacI"" - label=lacI promoter -  
         complement(4598..4675)"  
     promoter 4986..5004  
         /label=T7 promoter  
         /note="label=T7 promoter - note=""promoter for  
         bacteriophage T7 RNA polymerase"" - 4984..5002"  
     misc\_binding 5005..5027  
         /label=Lac Operator  
         /bound\_moiety="label=lac operator - bound\_moiety=""lac  
         repressor encoded by lacI"" - note=""The lac repressor  
         binds to the lac operator to - inhibit transcription in E.

coli. This inhibition can be - relieved by adding lactose or - isopropyl-beta-D-thiogalactopyranoside"

RBS 5044..5066  
/note="note=""efficient ribosome binding site from bacteriophage - T7 gene 10 (Olins and Rangwala, 1989)"" - 5042..5064"

CDS 5079..5096  
/label=6xHis

CDS 5100..6200  
/label=MBP

misc\_feature 6219..6243  
/label=AttB1

CDS 6246..6266  
/label=TEV site

CDS 6267..8447  
/codon\_start=1  
/label=PPR65  
/translation="SHDQMPGNAGFRKVELANSRDSVSVLCKTGRLKEALGIMNTMILQ GTRVYSDVFRGLLQECARLSLEQGREVHAAILKSGIQPNRYLENTLLSMYAKCGSLTD ARR VFDSIRDNRNIVSWTAMIEAFVAGNKNLEAFKCYETMMLAGCKPDKVTFVSLNAFT NPELLQLGQKVHMEIVEAGLELEPRVGTSLVGMYAKCGDISKARVIFDRLPEKNVVTWT LLIAGYAQQGQVDVALELLETMQQAQEVAPNKITFASILQGCSTTAALEHGKVKVHRYIIQ SGYGRELWVNSLITMYCKCGGLEEARLFSDLPHRDVVTWTAMVTGYAQLGFHDEAIN LFRRMQQQGIKPDKMTFTSVLTSCSSPAFLQEGKRIHQQLVHAGYNLDVYLSALVSMY AKCGSMDDASLVFNQMSERNVVAWTAIITGCAQHGRCREALEYFDQMKKQGIKPDKVTFF TSVLSACTHVGLVEEGRKHFRSMYLDYGIKPMVEHYSCFVDLLGRAGHLEEAENVILSM PFIPGPSVWGALLSACRVHSDVERGERAAENVLKLDPDDGAYVALSSIIYAAAGRYEDA EKVRQVMEKRDVVKPEPGQSWIEVDGKVHVHVEDKSHPESEQIYVELGKLTEQIKEMGY VPDTRFVLHDVDEEQKERILFSHSERLAITYGLMKTTPGMPPIRIVKNLRVCGDCHTATK FISKVVGREIIARDAQRFHHFADGVCSGDFW"

misc\_feature 8449..8473  
/label=AttB2

misc\_feature 8494..8535  
/label=PPR65\_ccmFCeU103PS  
/note="note=""Fragment extracted from [42 nt] : (Uncut 5'[0] / Uncut 3'[42])"

CDS 8541..8558  
/label=6xHis

terminator 8625..8672  
/label=T7 terminator  
/note="transcription terminator for bacteriophage T7 RNA polymerase"

ORIGIN

```

1 attggcgaat gggacgcgcc ctgtagcggc gcattaagcg cggcgggtgt ggtggttacg
61 cgcagcgtga ccgctacact tgccagcgcc ctagcgcccg ctcctttcgc tttcttcctt
121 tcctttctcg ccacgttcgc cggctttccc cgtcaagctc taaatcgggg gctcccttta
181 gggttccgat ttagtgcttt acggcacctc gaccccaaaa aacttgatta ggggtgatgg
241 tcacgtagtg ggccatcgcc ctgatagacg gtttttcgcc ctttgacggt ggagtccacg
301 ttctttaata gtggactctt gttccaaact ggaacaacac tcaaccctat ctcggtctat
361 tcttttgatt tataagggat tttgccgatt tcggcctatt ggttaaaaaa tgagctgatt
421 taacaaaaat ttaacgcgaa ttttaacaaa atattaacgt ttacaatttc aggtggcact
481 tttcggggaa atgtgcgcgg aaccctatt tgtttatttt tctaaataca ttcaaataatg
541 tatccgctca tgaattaatt cttagaaaaa ctcacgagc atcaaatgaa actgcaattt
601 attcatatca ggattatcaa taccatattt ttgaaaaagc cgtttctgta atgaaggaga
661 aaactcaccg aggcagttcc ataggatggc aagatcctgg tatcggctcg cgattccgac
721 tcgtccaaca tcaatacaac ctattaattt cccctcgtca aaaataaggt tatcaagtga
781 gaaatcacca tgagtgcgca ctgaatccgg tgagaatggc aaaagtttat gcatttcttt
841 ccagacttgt tcaacaggcc agccattacg ctcgctcatca aaatcactcg catcaaccaa
901 accgattatc attcgtgatt gcgcctgagc gagcgaat acgcgatcgc tgttaaaagg
961 acaattacaa acaggaatcg aatgcaacg gcgcaggaac actgccagcg catcaacaat
1021 attttcacct gaatcaggat attcttctaa tacctggaat gctgttttcc cggggatcgc
1081 agtgggtgagt aaccatgcat catcaggagt acggataaaa tgcttgatgg tcggaagagg
1141 cataaattcc gtcagccagt ttagtctgac catctcatct gtaacatcat tggcaacgct
1201 acctttgcca tgtttcagaa acaactctgg cgcacggggc ttccataca atcgatagat

```

1261 tgtcgcacct gattgcccga cattatcgcg agcccattta taccatata aatcagcatc  
1321 catgttggaa tttaatcgcg gcctagagca agacgtttcc cgttgaatat ggctcataac  
1381 accccttgta ttactgttta tgtaagcaga cagttttatt gttcatgacc aaaatccctt  
1441 aacgtgagtt ttcgtttccac tgagcgtcag accccgtaga aaagatcaaa ggatcttctt  
1501 gagatccitt ttttctgcgc gtaatctgct gcttgcaaac aaaaaaacca ccgctaccag  
1561 cgggtggttg tttgcccgat caagagctac caactctttt tccgaaggta actggcttca  
1621 gcagagcgca gataccaaat actgtccttc tagttagacc gtagttaggc caccacttca  
1681 agaactctgt agcaccgcct acatacctcg ctctgctaata cctgttacca gtggctgctg  
1741 ccagtggcga taagtcgtgt cttaccgggt tggactcaag acgatagtta ccggataagg  
1801 cgcagcggtc gggctgaacg gggggttctg gcacacagcc cagcttggag cgaacgacct  
1861 acaccgaact gagataccta cagcgtgagc tatgagaaag cgccacgctt cccgaagga  
1921 gaaaggcgga caggtatccg gtaagcggca gggtcggaac aggagagcgc acgagggagc  
1981 ttccaggggg aaacgcctgg tatctttata gtctgtcgg gtttcgccac ctctgacttg  
2041 agcgtcgatt tttgtgatgc tcgtcagggg ggcggagcct atggaaaaac gccagcaacg  
2101 cggccttttt acggttctct gccttttgct ggccttttgc tcacatgttc tttcctgcgt  
2161 tatcccctga ttctgtggat aaccgtatta ccgcctttga gtgagctgat accgctcgcc  
2221 gcagccgaac gaccgagcgc agcagtcag tgagcgagga agcgggaagag cgcctgatgc  
2281 ggtattttct ctttacgcat ctgtgcggta tttcacaccg catatatggt gcaactctcag  
2341 tacaatctgc tctgatgccg catagttaag ccagtataca ctccgctatc gctacgtgac  
2401 tgggtcatgg ctgcccccg acaccgcca acaccgctg acgcgccctg acgggcttgt  
2461 ctgctcccgg catccgctta cagacaagct gtgaccgtct ccgggagctg catgtgtcag  
2521 aggttttcac cgtcatcacc gaaacgcgcg aggcagctgc ggtaaagctc atcagcgtgg  
2581 tcgtgaagcg attcacagat gtctgcctgt tcatccgcgt ccagctcgtt gaggttctcc  
2641 agaagcgta atgtctgggt tctgataaag cgggccatgt taagggcgtt ttttctctgt  
2701 ttggtccta atgcctcctg gtaaggggga tttctgttca tgggggtaat gataccgatg  
2761 aaacgagaga ggatgctcac gatacggggt actgatgatg aacatgcccg gttactggaa  
2821 cgttgtgagg gtaaacaact ggcggtatgg atgcggcggg accagagaaa aatcactcag  
2881 ggtcaatgcc agcgttctgt taatacagat gtaggtgttc cacagggtag ccagcagcat  
2941 cctgcgatgc agatccggaa cataatggtg cagggcgctg acttccgcgt ttccagactt  
3001 tacgaaacac ggaaccgaa gaccattcat gttgttgctc aggtcgcaga cgttttgag  
3061 cagcagtcgc ttcacgttcg ctgcgctatc ggtgattcat tctgctaacc agtaaggcaa  
3121 ccccgccagc ctagccgggt cctcaacgac agggagcacga tcatgcgcac ccgtggggcc  
3181 gccatgccgg cgataatggc ctgcttctcg ccgaaacgtt tgggtggcggg accagtgacg  
3241 aaggcttgag cgagggcgtg caagattccg aataccgcaa gcgacaggcc gatcatcgtc  
3301 gcgctccagc gaaagcggtc ctcgccgaaa atgaccgaga gcgctgccgg cacctgtcct  
3361 acgagttgca tgataaagaa gacagtcata agtgccggca cgatagtcac gccccgcgcc  
3421 caccggaagg agctgactgg gttgaaggct ctcaagggca tcggtcgaga tcccgggtgcc  
3481 taatgagtga gctaacttac attaatgctg ttgctgctac tgcccgtttt ccagtcggga  
3541 aacctgtcgt gccagctgca ttaatgaatc ggccaacgcg cggggagagg cggtttgctg  
3601 attgggcgcc aggggtggtt ttttttcac cagttagacg ggcaacagct gattgccctt  
3661 caccgcctgg ccctgagaga gttgcagcaa gcggtccacg ctggtttgct ccagcagcgc  
3721 aaaatcctgt ttgatggtg ttaacggcag gatataacat gactgtctt cggtatcgtc  
3781 gtatcccact accgagatat ccgaccaccg gcgcagcccg gactcggtaa gtcgctcgt  
3841 tgcgcccagc gccatctgat cgttggcaac cagcatcgca gtgggaacga tggcctcatt  
3901 cagcatttgc atggtttggt gaaaaccgga catggcactc cagtcgcctt cccgttccgc  
3961 tatcggctga atttgattgc gagttagata tttatgccag ccagccagac gcagacgcgc  
4021 cgagacagaa cttaatgggc ccgctaacag cgcgatttgc tggtgacca atgcgaccag  
4081 atgctccacg cccagtcgcg taccgtcttc atgggagaaa ataatactgt tgatgggtgt  
4141 ctggtcagag acatcaagaa ataacgccgg aacattagtg caggcagctt ccacagcaat  
4201 ggcaccttgg tcatccagcg gatagttaat gatcagccca ctgacgcgtt gcgagagaag  
4261 attgtgacc gccgctttac aggttcgac gccgcttctg tctaccatcg acaccaccac  
4321 gctggcacc agttgatcgg cgcgagattt aatcgccgcg acaatttgcg acggcgcgtg  
4381 cagggccaga ctggagggtg caacgccaat cagcaacgac tgtttgccg ccagttggtg  
4441 tgccacgcgg ttgggaatgt aattcagctc cgccatcgcc gcttccactt tttcccgcgt  
4501 tttcgcagaa acgtggctgg cctggttcac cacgcgggaa acggtctgat aagagacacc  
4561 ggcatactct gcgacatcgt ataacgttac tggtttcaca ttcaccacc tgaattgact  
4621 ctcttccgg cgctatcatg ccataaccgcg aaaggttttg cgccattcga tgggtgtccg  
4681 gatctgacg ctctccctta tgcgactcct gcattagga gcagcccagt agtaggttga  
4741 ggccgttgag caccgcccgc gcaaggaatg gtgcatgcaa ggagatggcg cccaacagtc  
4801 ccccggccc gggcctgcc accataccca agcgcctcat agcgcctatg agcccgaagt  
4861 ggcgagccc atcttccca ctggtgatgt cggcgatata ggcgccagca accgcacctg  
4921 tggcgcgggt gatgccggcc acgatgcgtc cggcgtagag gatcgagatc tcgatcccgc  
4981 gaaattaata cgactcacta taggggaatt gtgagcggat aacaattccc ctctagaaat  
5041 aattttgttt aactttaaga aggagatata ccatgaaaca tcaccatcac catcaccaca

5101 tgaaaatcga agaaggtaaa ctggtaatct ggattaacgg cgataaaggc tataacggtc  
5161 tcgctgaagt cggtaagaaa ttcgagaaa ataccggaat taaagtcacc gttgagcatc  
5221 cggataaact ggaagagaaa ttcccacagg ttgctggcaac tggcgatggc cctgacatta  
5281 tcttctgggc acacgaccgc tttggtggct acgctcaatc tggcctggtg gctgaaatca  
5341 ccccgacaa agcgttccag gacaagctgt atccgtttac ctgggatgcc gtacgttaca  
5401 acggcaagct gattgcttac ccgatcgtg ttgaagcgtt atcgtgatt tataacaaag  
5461 atctgctgcc gaaccggcca aaaacctggg aagagatccc ggcgctggat aaagaactga  
5521 aagcgaagg taagagcgcg ctgatgttca acctgcaaga accgacttc acctggccgc  
5581 tgattgctgc tgacgggggt tatgcttca agtatgaaa cggcaagtac gacattaaag  
5641 acgtgggctg ggataacgct ggcgcgaaag cgggtctgac cttcctggtt gacctgatta  
5701 aaaacaaaca catgaatgca gacaccgatt actccatcgc agaagctgcc tttataaag  
5761 gcgaaacagc gatgaccatc aacggcccgt gggcatggtc caacatcgac accagcaaag  
5821 tgaattatgg tgtaacggta ctgccgacct tcaagggta accatccaaa ccgttcggtg  
5881 gcgtgctgag cgcaggtatt aacgccgcca gtccgaacaa agagctggca aaagagttcc  
5941 tcgaaaacta tctgctgact gatgaaggtc tgggaagcgg taataaagac aaaccgctgg  
6001 gtgccgtagc gctgaagtct tacgaggaag agttggcgaa agatccacgt attgccgcca  
6061 ctatggaaaa cgcccagaaa ggtgaaatca tgccgaacat cccgcagatg tccgctttct  
6121 ggtatgccgt gcgtactgcg gtgatcaacg ccgccagcgg tcgctcagact gtcgatgaag  
6181 ccctgaaaga cgcgcagact cccggtagcg gtaccatgac aagtttgtag aaaaaagcag  
6241 gcttagagaa tctttatfff cagggctctc acgatcagat gccaggggat gcaggctttc  
6301 gcaaggtcga gaccctagcg aattctcag atgtgagtgt tctgtgtaag acagggcgtt  
6361 tgaaggaggc actggggatt atgaatacga tgattctaca aggaactcgt gtctactcag  
6421 acgtatttcg aggtcttctg caagagtgtg ccagattgag atcattggaa caaggtagag  
6481 aagtcctatg tgcaatfffg aagatggga ttcaacctaa tagatacctt gaaaacacgt  
6541 tattgagcat gtagtcaag tgtgggagtc tgacggatgc tagacgggta ttcgatcgca  
6601 ttcgagatcg caatatcgtg tcctggactg cgatgattga agcatttggt gctggaaata  
6661 aaaatctaga ggccttcaag tgctatgaaa cgatgaagct ggcgggatgc aagcccgaca  
6721 aggtcacggt tgtgagcctt ctcaacgcgt ttacaaacc ggagctgta caactaggtc  
6781 agaaggtgca catggaattt gttgaagctg gactggagtt agaacctcga gttggtacct  
6841 ctctgttgg gatgtatgcc aagtgtggag atatttccaa ggcacgagtt atttttgaca  
6901 gattaccaga aaagaacgtg gtcacgtgga ctctcttaat cgctggttac gcacagcaag  
6961 gtcaagtcga cgttgctctg gagcttttgg agacgatgca gcaagcagaa gtagctccca  
7021 acaaaatcac gtttgctagc attcttcaag gttgcacaac tccagcggct ctagagcatg  
7081 gcaagaaggt ccacagatat atcattcaat cgggatatgg tagagaactt tgggtggtca  
7141 attcgtgat taccatgtat tgcaagtgtg gaggactgga agaagcccgt aaactgttta  
7201 gtgacttgcc acatcgggat gtggtcactt ggacagccat ggtcacaggc tacgctcaac  
7261 taggattcca tgacgaggca ataatctct ttcggcggat gcagcagcaa ggcataaac  
7321 cggataagat gacttttaca agcgttttga caagttgttc aagccctgca tttcttcaag  
7381 aagggaaaag gatccatcaa cagctggttc atgctggata caatctggat gtctatctac  
7441 aaagtgcctt tgttagtatg tatgcaaaa gtggaagcat ggatgacgca agtctggtgt  
7501 tcaatcagat gagtgagcgg aacgttgttg cctggactgc tataataaca ggttgtgctc  
7561 agcacggagc atgcagagag gcccttgaat actttgatca gatgaaaaag caaggaataa  
7621 aaccggacaa ggtaaccttc acaagcgtcc tctcagcatg caccacgta ggtctagtgg  
7681 aggaaggtcg caagcacttc cgctccatgt acctagacta tggcatcaaa cccatggttg  
7741 agcactacag ctgcttcgta gaccttctgg gccgagcagg ccatttgtag gaagcagaga  
7801 acgttatcct cagcatgcca ttcataccgg gtccctcagt ttggggggca ttgctcagcg  
7861 cttgcagggt ccacagtgac gttgaacgtg gcgagcgtgc tgcagagaaat gtcctcaagc  
7921 tggaccctga tgatgatgga gcttacgtcg cattgtcagag tatctacgct gctgctggcc  
7981 gatatgaaga cgctgagaaa gtgctggcaag tgatggagaa aagggatggt gtcaaggagc  
8041 cggggcagag ctggattgaa gtagacggca aggtgcatgt gtttcatgtg gaggataagt  
8101 cccaccggga atctgagcag atttacgtcg agctcgggaa gctaactgaa cagatcaagg  
8161 agatgggta tgtaccggac accagatttg ttctgcacga cgtggatgag gaacagaagg  
8221 agcggatact tttctctcac agtgagaggc tggcgatcac ttacgggctg atgaagacac  
8281 caccgggaat gcctatccgt attgtgaaga atctgagat ggtgtgggat tgctatacgg  
8341 cgacgaagtt tatctcgaag gtggttggtg gagagatcat tgccagggat gcgacgggt  
8401 ttcattcatt tgccgatgga gtatgttctt gtggggattt ttggtgagac ccagctttct  
8461 tgtacaaagt ggtgactcga atttaataa gcttatacta tttcaatggt tggtaagtag  
8521 agatgttccc acattcgaag caccaccacc accaccactg agatccggct gctaacaaag  
8581 cccgaaagga agctgagttg gctgctgcca ccgctgagca ataactagca taacccttg  
8641 gggcctctaa acgggtcttg aggggttttt tgctgaaagg aggaactata tccgg
