# Supplementary material for: Plant-type pentatricopeptide repeat proteins with a DYW domain drive C-to-U RNA editing in Escherichia coli
Source: PubMed Central journal article supplement (PMC6397227; doi:10.1038/s42003-019-0328-3), 2019-03-01
Supplement: 42003_2019_328_MOESM8_ESM.pdf [file 42003_2019_328_MOESM8_ESM.pdf]

LOCUS Exported 8590 bp ds-DNA circular SYN 13-JAN-2019  
 DEFINITION synthetic circular DNA  
 ACCESSION .  
 VERSION .  
 KEYWORDS .  
 SOURCE synthetic DNA construct  
 ORGANISM synthetic DNA construct  
 REFERENCE 1 (bases 1 to 8590)  
 AUTHORS .  
 TITLE Direct Submission  
 JOURNAL Exported Jan 13, 2019 from SnapGene Viewer 4.2.11  
<http://www.snapgene.com>  
 COMMENT Ligation of : PPR56\_LR\_pET41KMCS.xdna [8540 nt] : (SgsI[8387] /  
 SmlI[8373]) to PPR56\_nad4\_Hy.xdna [46 nt] : (Uncut 5'[0] / Uncut  
 3'[46])  
 FEATURES Location/Qualifiers  
   source 1..8590  
           /organism="synthetic DNA construct"  
           /mol\_type="other DNA"  
   rep\_origin 14..469  
           /direction=RIGHT  
           /label=f1 ori  
           /note="direction=RIGHT - label=f1 ori - note=""f1  
           bacteriophage origin of replication; arrow - indicates  
           direction of (+) strand synthesis"" - 12..467"  
   CDS complement(562..1377)  
           /product="aminoglycoside phosphotransferase"  
           /label=KanR  
           /note="codon\_start=1 - gene=""aph(3')-Ia"" -  
           product=""aminoglycoside phosphotransferase"" - label=KanR  
           - note=""confers resistance to kanamycin in bacteria or  
           G418 - (Geneticin(R)) in eukaryotes"" -  
           translation=""MSHIQRETSCSRPRLNSNMDADLYGYKWARDNVGQSGATIYRLYG  
           - KPDAPE"  
   rep\_origin 1499..2087  
           /direction=RIGHT  
           /label=ori  
           /note="high-copy-number Cole1/pMB1/pBR322/pUC origin of  
           replication"  
   misc\_feature 2273..2415  
           /label=bom  
           /note="basis of mobility region from pBR322"  
   CDS complement(2517..2708)  
           /product="Rop protein, which maintains plasmids at low copy  
           number"  
           /label=rop  
           /note="codon\_start=1 - gene=""rop"" - product=""Rop  
           protein, which maintains plasmids at low copy - number"" -  
           label=rop -  
           translation=""MTKQEKTALNMARFIRSQTLTLEKLNELDADEQADICESLHDA  
           - DELYRSLARFGDDGENL"" - complement(2515..2706)"  
   CDS complement(3517..4599)  
           /product="lac repressor"  
           /label=lacI  
           /note="codon\_start=1 - gene=""lacI"" - product=""lac  
           repressor"" - label=lacI - note=""The lac repressor binds  
           to the lac operator to - inhibit transcription in E. coli.  
           This inhibition can be - relieved by adding lactose or -  
           isopropyl-beta-D-thiogalactopyranosid"  
   promoter complement(4600..4677)  
           /label=lacI promoter  
           /note="gene=""lacI"" - label=lacI promoter -  
           complement(4598..4675)"  
   promoter 4986..5004

```

/label=T7 promoter
/note="label=T7 promoter - note=""promoter for
bacteriophage T7 RNA polymerase"" - 4984..5002"
primer_bind 5005..5029
/label=lac operator
/note="label=lac operator - bound_moiety=""lac repressor
encoded by lacI"" - note=""The lac repressor binds to the
lac operator to - inhibit transcription in E. coli. This
inhibition can be - relieved by adding lactose or -
isopropyl-beta-D-thiogalactopyranoside"
RBS 5044..5066
/note="note=""efficient ribosome binding site from
bacteriophage - T7 gene 10 (Olins and Rangwala, 1989)"" -
5042..5064"
CDS 5079..5096
/label=6xHis
/note="codon_start=1 - product=""6xHis affinity tag"" -
label=6xHis - translation=""HHHHHH"" - 5077..5094"
CDS 5100..6200
/label=MBP
/note="codon_start=1 - gene=""malE (mutated)"" -
product=""maltose binding protein from E. coli"" -
label=MBP - note=""This version of the gene does not encode
a signal - sequence, so MBP will remain in the cytosol."" -
translation=""MKIEEGKLVIIWINGDKGYNGLAIEVGKKFEKDTGI"
primer_bind 6107..6127
/label=M437
misc_feature 6219..6243
/label=attB1
6226..8356
/note="note=""Fragment inserted from PPR56_BP_Zeo.xdna into
petG_41K+MCS.gb.xdna [LR] reaction"
misc_feature 6246..6266
/label=TEV site
misc_feature 6266..8339
/label=PPR56
/note="exclude the N-terminal signal peptide"
CDS 6267..8339
/codon_start=1
/label=PPR56
/translation="VVLNRLQRGLITDSFMYVEVLKRCCLKQKDLMAAKQVHDCIIKSR
MEQNAHVMMNLLHVYIECGRLQEARCVFDALVKKSGASWNAMIAGYVEHKHAEDAMRLF
REMCHEGVQPNAGTYMIILKACASLSALKWGKEVHACIRHGGLES DVRVGTALLRMYGK
CGSINEARRIFDNLNMNHDIIISWTVMIGAYAQSGNGKEAYRLMLQMEQEGFKPNAITYVS
ILNACASEGALKWVKRVHRHALDAGLELDVRVGTALVQMYAKSGSIDDARVVFDRMKVR
DVVSWNVMI GAF AEHGRGHEAYDLFLQM QTEGCKPDAIMFLSILNACASAGALEWVKKI
HRHALDSGLEVDVRVGTALVHMYKSGSIDDARVVFDRMKVRNVVSWNAMISGLAQHGL
GQDALEVFRMTAHGVKPDVRTFVAVLSACSHAGLVDEGRS QYLAMTQVYGI EPDVSHC
NCMVDLLGRAGRLMEAKLFIDNMAVDPDEATWGALLGSCRTYGNVELGELVAKERLKLD
PKNAATYVLLSNIYAEAGKWDMSWVRTMMRERGERIRKEPGRSWIEVDNKIHDFLVADSS
HPECKEINESKDKVIEKIKAEGYIPDTRLVLKNKNMKDKELDICSHSEKLAIVYGLMHT
PPGNPIRVFKNLRVCTDCHGATKLISKVEGREIIVRDANRFHHFKDGVCSGCDYW"
primer_bind 7239..7258
/label=M1002
misc_feature 8341..8365
/label=attB2
misc_feature 8377..8422
/label=PPR56_nad4eU272SL
/note="41+5"
CDS 8436..8453
/label=6xHis
/note="codon_start=1 - product=""6xHis affinity tag"" -
label=6xHis - translation=""HHHHHH"" - 7958..7975"
primer_bind complement(8508..8530)

```

terminator /label=M438  
8520..8567  
/label=T7 terminator  
/note="transcription terminator for bacteriophage T7 RNA  
polymerase"

ORIGIN

1 attggcgaat gggacgcgcc ctgtagcggc gcattaagcg cggcgggtgt ggtggttacg  
61 cgcagcgtga ccgctacact tgccagcgcc ctagcgccc ctcctttcgc tttcttcctt  
121 tcctttctcg ccacgttcgc cggctttccc cgtcaagctc taaatcgggg gctcccttta  
181 gggttccgat ttagtgcttt acggcacctc gaccccaaaa aacttgatta gggtgatggt  
241 tcacgtagtg ggccatcgcc ctgatagacg gtttttcgcc ctttgacggt ggagtccacg  
301 ttctttaata gtggactctt gttccaaact ggaacaacac tcaaccctat ctcgggtctat  
361 tcttttgatt tataagggat tttgccgatt tcggcctatt ggttaaaaaa tgagctgatt  
421 taacaaaaat ttaacgcgaa ttttaacaaa atattaacgt ttacaatttc aggtggcact  
481 tttcggggaa atgtgcgagg aacccttatt tgtttatttt tctaaatata ttcaaataatg  
541 tatccgctca tgaattaatt cttagaaaaa ctcatcgagc atcaaatgaa actgcaattt  
601 attcatatca ggattatcaa taccatatth ttgaaaaagc cgtttctgta atgaaggaga  
661 aaactcaccg aggcagttcc ataggatggc aagatcctgg tatcgggtctg cgattccgac  
721 tcgtccaaca tcaatacaac ctattaatth cccctcgtca aaaataaggt tatcaagtga  
781 gaaatcacca tgagtgcgca ctgaatccgg tgagaatggc aaaagtttat gcatthcttt  
841 ccagacttgt tcaacaggcc agccattacg ctcgtcatca aaatcactcg catcaaccaa  
901 accgttattc attcgtgatt gcgcctgagc gagacgaaat acgcatcgc tgttaaaagg  
961 acaattacaa acaggaatcg aatgcaaccg gcgcaggaac actgccagcg catcaacaat  
1021 atthtcacat gaatcaggat atthctctaa tacttggaat gctgtthtcc cggggatcgc  
1081 agtggtagt accatgcat catcaggat acggataaaa tgcttgatgg tcggaagagg  
1141 cataaattcc gtcagccagt ttagtctgac catctcatct gtaacatcat tggcaacgct  
1201 accttgcca tgtttcagaa acaactctgg cgcacggggc thcccataca atcgatagat  
1261 tgtcgcacct gattgcccga cattatcgcg agcccattta taccatata aatcagcatc  
1321 catgttgga tttaatcgcg gcctagagca agacgtthcc cgttgaaat ggtcataac  
1381 acccttgta ttactgtth tgaagcaga cagthttatt gttcatgacc aaaatccctt  
1441 aacgtgagtt ttcgttccac tgagcgtcag acccgtaga aaagatcaaa ggatcttctt  
1501 gagatcctt thttctgcgc gtaatctgct gcttgcaaac aaaaaaacca ccgctaccag  
1561 cgggtggttg thtgccggat caagagctac caactctth tccgaaggta actggcttca  
1621 gcagagcgca gataccaat actgtccttc tagttagacc gtagttaggc caccacttca  
1681 agaactctgt agcaccgct acatacctcg ctctgctaat cctgttacca gtggctgctg  
1741 ccagtggcga taagtcgtgt cttaccgggt tggactcaag acgatagttta ccggataagg  
1801 cgcagcggtc gggctgaacg ggggttctgt gcacacagcc cagcttgag cgaacgacct  
1861 acaccgaact gagataccta cagcgtgagc tatgagaaag cgccacgctt cccgaagga  
1921 gaaagcgga caggtatccg gtaagcggca gggctcggaa aggagagcgc acgagggagc  
1981 thccagggg aaacgcctgg tatctthata gtctgtcgg thttcggccac ctctgacttg  
2041 agcgtcagtt thtgtagtc tcgtcagggg ggccggagct atggaaaaac gccagcaacg  
2101 cggctthtt acggttctg gcctthtgc ggcctthtgc tcacatgttc thtctcgtg  
2161 tatcccctga thctgtggat aaccgtatta ccgcctthga gtgagctgat accgctcgc  
2221 gcagccgaac gaccgagcg agcagtcag tgagcgagga agcgggaagag cgcctgatgc  
2281 ggtatthtct cttacgcat ctgtcggta thtcacaccg catatatggt gcaactctcag  
2341 tacaatctgc tctgatgccg catagthtaag ccagtataca ctccgctatc gctacgtgac  
2401 tgggtcatgg ctgcgccccg acaccgcca acaccgctg acgcgccctg acgggcttgt  
2461 ctgctcccg catccgctta cagacaagct gtgaccgtct cgggagctg catgtgtcag  
2521 aggtthtcac cgtcatcacc gaaacgcgcg aggcagctgc ggtaaagctc atcagcgtgg  
2581 tcgtgaagcg attcacagat gtctgcctgt tcatccgct ccagctcgtt gaggthtctc  
2641 agaagcgth atgtctggct tctgataaag cgggcatgt taagggcgg thtttctctg  
2701 thggtcactg atgcctccgt gtaaggggga thtctgttca tgggggtaat gataccgatg  
2761 aaacgagaga ggatgctcac gatacgggtt actgatgatg aacatgcccg gttactggaa  
2821 cgttgtagg gtaacaact ggcggatgg atgcggcgg accagagaaa aatcactcag  
2881 ggtcaatgcc agcgttctgt taatacagat gtaggtgttc cacagggtag ccagcagcat  
2941 cctgcgatgc agatccggaa cataatggtg cagggcgtg acttccgct thccagactt  
3001 tacgaaacac ggaaccgaa gaccattcat gttgttgctc aggtcgcaga cgtthtgcag  
3061 cagcagtcgc thcagttcg ctgcgtatc ggtgattcat tctgctaacc agtaaggcaa  
3121 ccccgccagc ctgaccgggt cctcaacgac aggagcacga tcatgcgac ccgtggggcc  
3181 gccatgcggc cgataatggc ctgttctcg ccgaaacgtt tggtagcgg accagtgacg  
3241 aaggcttag cgagggctg caagatccg aataccgcaa gcgacagcc gatcatcgtc  
3301 gcgtccagc gaaagcggtc ctgcggaaa atgaccaga gcgctgccg cacctgtctc  
3361 acgagttgca tgataaagaa gacagctata agtgccgca cgatagctat gccccgcgc  
3421 caccggaagg agctgactgg gttgaaggct ctcaagggca tcggtcgaga tcccgggtgc

3481 taatgagtga gctaacttac attaattgcg ttgcgctcac tgcccgcttt ccagtcggga  
3541 aacctgtcgt gccagctgca ttaatgaatc ggccaacgcg cggggagagg cggtttgct  
3601 attgggcgcc aggggtggtt ttcttttcac cagtgagacg ggcaacagct gattgccctt  
3661 caccgcctgg ccctgagaga gttgcagcaa gcggtccacg ctggtttgcc ccagcaggcg  
3721 aaaatcctgt ttgatggtgg ttaacggcgg gatataacat gagctgtctt cggtatcgtc  
3781 gtatcccact accgagatat ccgcaccaac gcgcagcccg gactcggtaa tggcgcgcat  
3841 tgcgcccagc gccatctgat cgttggcaac cagcatcgca gtgggaacga tggcctcatt  
3901 cagcatttgc atggtttggt gaaaaccgga catggcactc cagtcgcctt cccgttccgc  
3961 tatcggctga atttgattgc gagtgagata tttatgccag ccagccagac gcagacgcgc  
4021 cgagacagaa cttaatgggc ccgctaacag cgcgatttgc tggtgacca atgcgaccag  
4081 atgctccacg cccagtcgcy taccgtcttc atgggagaaa ataatactgt tgatgggtgt  
4141 ctggtcagag acatcaagaa ataacgccgg aacattagtg caggcagctt ccacagcaat  
4201 ggcacccctg tcatccagcg gatagttaat gatcagccca ctgacgcggt gcgagagaag  
4261 attgtgcacc gccgctttac aggtctcgac gccgcttcgt tctaccatcg acaccaccac  
4321 gctggcacc agttgatcgg cgcgagattt aatcgccgcy cagcaacgac tgtttgcccg ccagttgttg  
4381 cagggccaga ctggagggtg caacgccaat cagcaacgac cgccatcgcc gcttccactt tttccgcgt  
4441 tgccacgcyg ttgggaatgt aattcagctc cagcgggaa acggtctgat aagagacacc  
4501 tttcgagaaa acgtggctgg cctggttcac cagcgggaa acggtctgat aagagacacc  
4561 ggcatactct gcgacatcgt ataacgttac tggtttcaca ttcaccacc tgatttgact  
4621 ctcttccggg cgctatcatg ccataccgcy aaaggtttg cgcattcga tgggttccgg  
4681 gatctcgacg ctctccctta tgcgactcct gcattagaa gcagcccagt agtaggttga  
4741 ggccgttgag caccgcccgc gcaaggaatg gtgcatgcaa ggagatggcy cccaacagtc  
4801 cccggccac ggggctgccc accataccca cgcgaaaca agcgtcatg agcccgaagt  
4861 ggcgagccg atcttccca tcggtgatgt cggcgatata ggcgcagca accgacctg  
4921 tggcgccggt gatgccgccc acgatcgcgt cggcgtagag gatcgagatc tcatcccg  
4981 gaaattaata cgactcacta taggggaatt gtgagcggat aacaattccc ctctagaat  
5041 aattttgttt aactttaaga aggagatata ccatgaaaca tcaccatcac catcaccaca  
5101 tgaaaatcga agaaggtaaa ctggtaatct ggattaacgg cgataaaggc tataacggtc  
5161 tcgctgaagt cggtaagaaa ttcgagaaa ataccggaat taaagtcacc gttgagcatc  
5221 cggataaact ggaagagaaa tcccacaggy ttgcygcaac tggcgatggc cctgacatta  
5281 tcttctgggc acacgaccgc tttggtggct acgctcaatc tggcctgttg gctgaaatca  
5341 cccggacaa agcgttccag gacaagctgt atccgtttac ctgggatgcc gtacgttaca  
5401 acggcaagct gattgcttac ccgatcgtg ttgaagcgtt atcgctgatt tataacaaag  
5461 atctgctgcc gaaccgcca aaaacctggg aagagatccc ggcgctggat aaagaactga  
5521 aagcgaaagg taagagcgcg ctgatgttca acctgcaaga accgtacttc acctggccgc  
5581 tgattgctgc tgacgggggt tatgcttca agtatgaaaa cggcaagtac gacattaaag  
5641 acgtgggcyt ggataacgct ggcgcgaaag cgggtctgac cttcctggtt gacctgatta  
5701 aaaacaaaca catgaatgca gacaccgatt actccatcgc agaagctgcc tttataaaag  
5761 gcgaaacagc gatgaccatc aacggcccgt gggcatggtc caacatcgac accagcaaag  
5821 tgaattatgg tgtaacggta ctgccgacct tcaagggtca accatccaaa ccgttcgttg  
5881 gcgtgtgag cgcaggtatt aacgcccga gtccgaacaa agagctggca aaagagttcc  
5941 tcgaaaacta tctgtgact gatgaaggtc tggaaagcgt taataaagac aaaccgctgg  
6001 gtgcccagc gctgaagtct tacgagaag agttggcgaa agatccacgt attgccgcca  
6061 ctatggaaaa cgcccagaaa ggtgaaatca tgccgaacat cccgcagatg tccgctttct  
6121 ggtatgccgt gcgtactgcy gtgatcaacg ccgccagcgy tcytcagact gtcgatgaag  
6181 ccctgaaaga cgcgcagact cccggtagcy gtaccatgac aagtttgtac aaaaaagcag  
6241 gcttagagaa tctttatttt cagggcgtgg ttctgatgaa ccytctgcaa cgaggcctta  
6301 ttacagattc ttttatgtat gttgaagttt tgaagcgytg cttgaagcaa aaagacctta  
6361 tggcagccaa gcaggttcat gattgcatca tcaaaagcag aatggaacaa aacgcacatg  
6421 tgatgaacaa cctcctgcat gtgtacatcy aatgtgggag attgcaggag gcacgctgtg  
6481 tgtttgatgc acttgtgaaa aagagtgytg ctagtggaa tgccatgatc gcaggttatg  
6541 tggagcacia gcatgccgag gatgcaatga gactttttag ggaaatgtgc cacgaaggtg  
6601 tgcagccaaa tgcgggtact tacatgatca tcttgaaggc ttgtgccagt ttgtccgcgt  
6661 tgaatgggg caagaagtt catgcatgca ttagacatgg tgggctttaa tcagatgtgc  
6721 ggggtggggac tgcccttctt aggatgtatg gaaagtgtgg gtccatcaac gaggcaaggc  
6781 gtatttttga taacctgatg aatcatgata tcatctcctg gactgtgatg attggagctt  
6841 atgcacaaag tggaaatggc aaggaagcat atcgacttat gttacaaatg gaacaggaag  
6901 gattcaaacc aaatgcaatc acttatgtga gcatcttgaa cgcagtgtgca agtgaggggg  
6961 cattgaagtg ggtgaagagg gttcacaggy atgccttggg tgcagggctt gaggttggatg  
7021 tgcgtgtggg cactgcactt gttcaaatgt gttcaaatgt atgcaaaagag tggtagcact  
7081 gattgggtgt tgacagaatg aaggtgcgtg atgtgtatc atggaatgtg atgataggcy  
7141 ctttgcaga acatggcgtt gggcatgaa catatgatct gtttcttcag atgcagacag  
7201 agggctgtaa gccagatgca atcatgtttt tgagcatctt gaatgcatgt gcaagtgcag  
7261 gggcattgga gtgggtgaag aagattcaca ggcattgcct ggattcaggg cttgaggttg

7321 atgtgcgtgt gggcactgca cttgttcaca tgtactcaaa gagtggtagc attgatgatg  
7381 cgcgagtggg gtttgacaga atgaagggtc gcaatgttgt atcatggaat gcgatgattt  
7441 ctggccttggc acaacatggt cttgggcagg acgctttgga ggTTTTtaga cgaatgactg  
7501 cacacgggtg gaagcctgat agggtcacat ttgtagcagt tctgtcagca tgcagtcatg  
7561 caggccttgt tgatgaaggt cgttcccagt atttggctat gacacaagtt tatggcattg  
7621 aaccgatgt gtctcattgt aactgcatgg tggatctcct ggggcgggca ggacgcttga  
7681 tgaagcaaaa gctcttcatt gataacatgg cagttgacct tgatgaagca acttggggag  
7741 ccctgcttgg ttctttaga acttatggta acgtagagtt gggcgaactt gttgcgaaag  
7801 aacgtctgaa attggatccg aaaaatgctg ctacctatgt tctcctttcc aacatctatg  
7861 ctgaagctgg aaagtgggac atggtatcat gggtgcgac tatgatgctg gagagagga  
7921 ttcgcaagga gccaggacgt agctggatcg aagtcgataa caagattcat gattttttgg  
7981 tagccgactc atctcatcca gaatgcaagg agataaatga aagtaaggac aaagtgattg  
8041 aaaaaataaa ggctgaaggg tacattcctg ataccggct agtgctgaag aacaagaaca  
8101 tgaaggacaa agaacttgat atttgctctc acagtgagaa gttggcaatt gtgtatgggc  
8161 tgatgatac acccctgga aatcctattc gtgtattcaa gaaccttcgg gtgtgcaccg  
8221 attgtcatgg agcaactaag ttaatctcaa aggtggaggg acgagagatc atagtgaggg  
8281 atgctaactg gttcacat tttaaagatg gcgtctgctc atgtggatg tactgggtgag  
8341 accagcttt cttgtacaaa gtggtgactc gaattttcaa acatcaattt ttatataggt  
8401 atagacggta tctcttcatt ttcgcgcctt cgaagcacca ccaccaccac cactgagatc  
8461 cggctgctaa caaagcccga aaggaagctg agttggctgc tgccaccgct gagcaataac  
8521 tagcataacc ccttggggcc tctaaacggg tcttgagggg ttttttctg aaaggaggaa  
8581 ctatatccgg

//
